# Supplementary material for: Highly efficient electrochemical detection of H2O2 utilizing an innovative copper porphyrinic nanosheet decorated bismuth metal–organic framework modified electrode
Source: Royal Society of Chemistry journal article supplement (doi:10.1039/d3ay01804k), 2023-12-18
Supplement: d3ay01804k1.pdf [file d3ay01804k1.pdf]

## Supporting information

### Highly Efficient Electrochemical Detection of H<sub>2</sub>O<sub>2</sub> Utilizing an Innovative Copper Porphyrinic Nanosheet Decorated Bismuth Metal-Organic Framework Modified Electrode

Nandha Gopal Balasubramaniyan, Panneerselvam Perumal\*

Department of Chemistry, SRM Institute of Science and Technology, Kattankulathur,  
Chennai, Tamil Nadu 603 203, India.

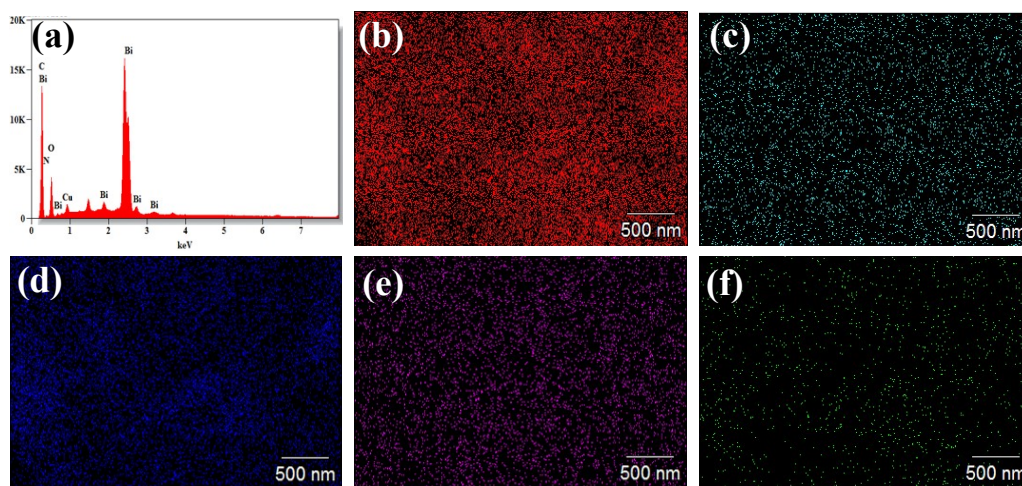

**Fig. S1** (a) EDX spectrum of intercalated Bi-MOF and Cu-TCPP nanosheet, (b-f) shows the elemental mapping of Carbon, Copper, Oxygen, Bismuth, and Nitrogen.

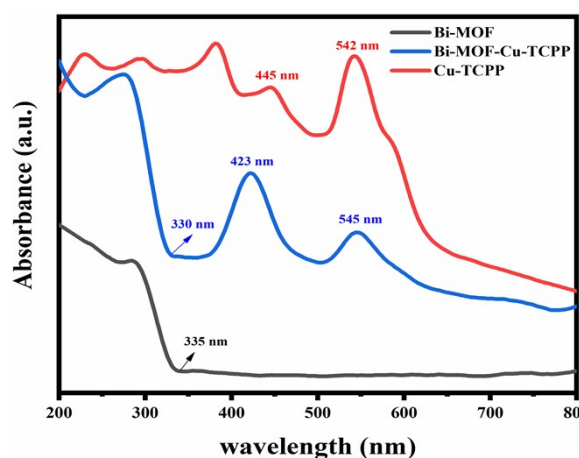

**Fig. S2** UV-Vis spectra of Bi-MOF, Bi-BTC-Cu-TCPP, Cu-TCPP

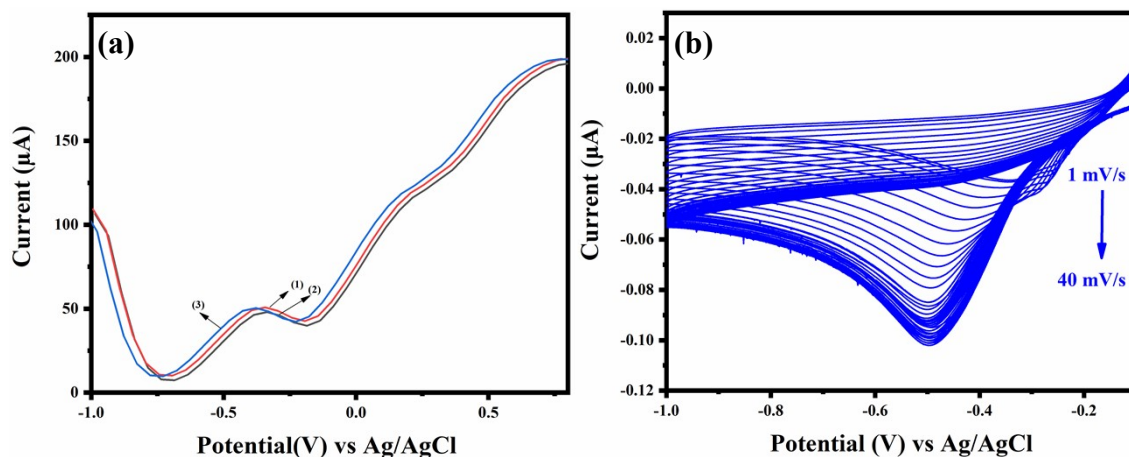

**Fig. S3** (a) Repeatability and Current response bar diagram of  $H_2O_2$  1st Cycle (1), 2nd Cycle (2), 3rd Cycle (3), (b) Stability of Bi-BTC-Cu-TCPP in the presence of  $H_2O_2$ .

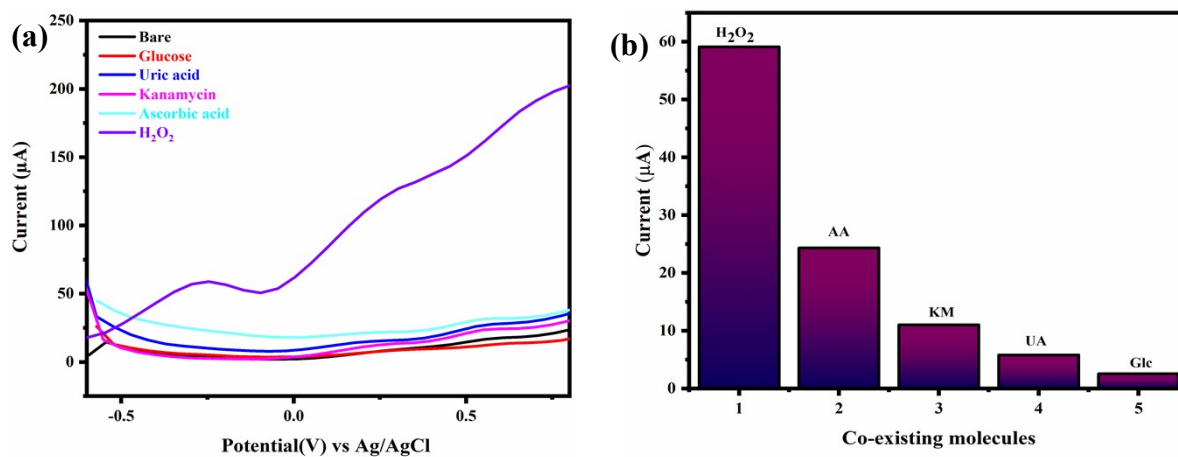

**Fig. S4** (a) DPV analysis interference molecules and  $H_2O_2$ , (d) Corresponding bar diagram for current vs. Co-existing molecules.

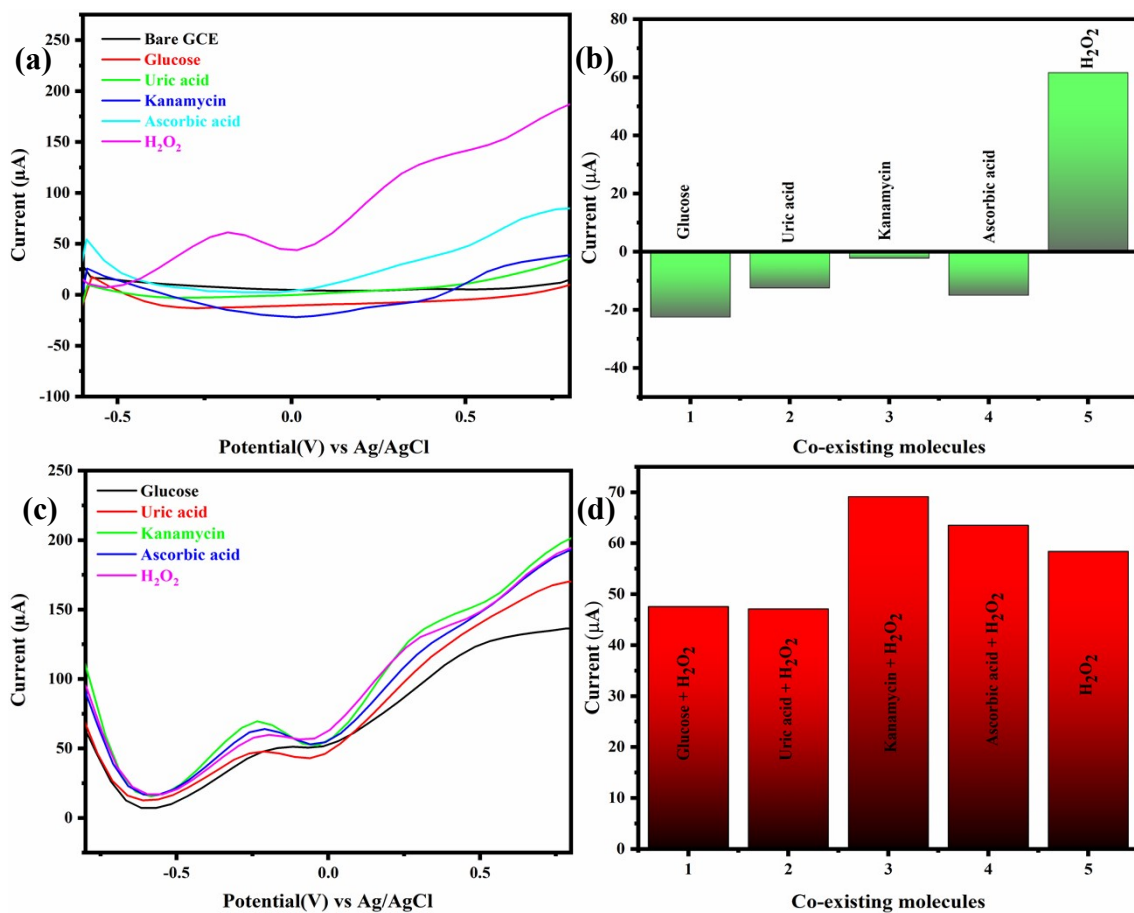

**Fig. S5** (a) DPV analysis interference molecules in the absence of  $H_2O_2$  in the milk sample, (b) Corresponding bar diagram for current vs. co-existing molecules in the absence of  $H_2O$ , (c) DPV analysis interference molecules in the presence of  $H_2O_2$  in the milk sample, (d) Corresponding bar diagram for current vs. co-existing molecules in the presence of  $H_2O_2$ .
